# Supplementary material for: Towards nanoparticles with site-specific degradability by ring-opening copolymerization induced self-assembly in organic medium
Source: Royal Society of Chemistry journal article supplement (doi:10.1039/d0py01425g), 2021-01-01
Supplement: d0py01425g1.pdf [file d0py01425g1.pdf]

## Supplementary Information

# Towards Nanoparticles with Site-Specific Degradability by Ring-Opening Copolymerization Induced Self-Assembly in Organic Medium

*Chen Zhu,<sup>†</sup> Julien Nicolas\**

<sup>1</sup> Université Paris-Saclay, CNRS, Institut Galien Paris-Saclay, 92296 Châtenay-Malabry,  
France

\*To whom correspondence should be addressed.

Email: [julien.nicolas@u-psud.fr](mailto:julien.nicolas@u-psud.fr)

Tel.: +33 1 46 83 58 53

**Table S1.** Macromolecular Characteristics of PLMA Macro-CTAs Synthesized by RAFT Polymerization in Anhydrous Toluene at 70 °C for 4 h.

| Macro-CTA          | RAFT agent | LMA Conv. <sup>a</sup> (%) | $M_{n,SEC}^b$ (g.mol <sup>-1</sup> ) | $DP_{n,SEC}^c$ | $\bar{D}^b$ | $M_{n,NMR}^d$ (g.mol <sup>-1</sup> ) | $DP_{n,NMR}^e$ |
|--------------------|------------|----------------------------|--------------------------------------|----------------|-------------|--------------------------------------|----------------|
| PLMA <sub>18</sub> | CDSPA      | 49                         | 5 000                                | 18             | 1.13        | 4 700                                | 17             |
|                    | CDB        | 48                         | 4 900                                | 18             | 1.19        | 4 100                                | 15             |

<sup>a</sup> Determined by <sup>1</sup>H NMR. <sup>b</sup> Determined by SEC after precipitation. <sup>c</sup> Calculated according to:  $DP_{n,SEC} = (M_{n,SEC} - MW_{RAFT\ agent}) / MW_{LMA}$ . <sup>d</sup> Determined by <sup>1</sup>H NMR by integrating the signal from the RAFT agent (2H in the  $\alpha$ -position to the carboxylic acid of CDSPA at 3.3 ppm and 10H of the aromatic groups of CDB at 7.1-8.1 ppm) and the 2H of PLMA (3.8-4.0 ppm). <sup>e</sup> Determined by <sup>1</sup>H NMR according to:  $DP_{n,NMR} = (M_{n,NMR} - MW_{RAFT\ agent}) / MW_{LMA}$ .

**Table S2.** Macromolecular and Colloidal Properties of PLMA<sub>18</sub>-*b*-P(BzMA<sub>150</sub>-*co*-MDO) (**L<sub>18</sub>-Bz<sub>150</sub>M**) Diblock Copolymer Nanoparticles.

| Targeted copolymer                      | $f_{MDO,0}$ | Conv. <sup>a</sup> (%) / Time (h) | $F_{MDO}^b$ | Opened MDO <sup>c</sup> (%) | $M_{n,NMR}^d$ (g.mol <sup>-1</sup> ) | $M_{n,SEC}^e$ (g.mol <sup>-1</sup> ) | $\bar{D}^e$ | $D_z^f$ (nm) | PSD <sup>f</sup> |
|-----------------------------------------|-------------|-----------------------------------|-------------|-----------------------------|--------------------------------------|--------------------------------------|-------------|--------------|------------------|
| <b>L<sub>18</sub>-Bz<sub>150</sub>M</b> | 0.2         | 78/20                             | 0.04        | 75                          | 131 500                              | 36 800                               | 1.9         | 102          | 0.18             |
|                                         | 0.4         | 66/20                             | 0.10        | 66                          | 37 300                               | 45 600                               | 4.3         | 140          | 0.34             |
|                                         | 0.7         | 52/20                             | 0.19        | 75                          | 19 200                               | 46 000                               | 2.5         | 202          | 0.26             |

<sup>a</sup> BzMA conversion determined by <sup>1</sup>H NMR. <sup>b</sup> Determined by <sup>1</sup>H NMR after precipitation. <sup>c</sup> Determined by integrating the 2H of opened MDO (3.9–4.0 ppm) and the 4H of closed MDO (3.3–3.6 ppm). <sup>d</sup> Determined by <sup>1</sup>H NMR by integrating the 2H of MDO (2.5–2.9 ppm) and the 2H of BzMA (4.9–5.1 ppm). <sup>e</sup> Determined by SEC after precipitation. <sup>f</sup> Determined by DLS.

**Table S3.** Macromolecular and Colloidal Characteristics of **L<sub>18</sub>-Bz<sub>150</sub>**, **L<sub>18</sub>-Bz<sub>150</sub>MP** ( $f_{\text{MPDL}} = 0.2$ ) and **L<sub>18</sub>-Bz<sub>150</sub>M** ( $f_{\text{MDO}} = 0.2$ ) Nanoparticles as Function of the Reaction Time.

| Targeted copolymer                                                    | Time (h) | Conv. <sup>a</sup> (%) | $M_n^b$ (g.mol <sup>-1</sup> ) | $\bar{D}^b$ | $D_z^c$ (nm) | PSD <sup>c</sup> |
|-----------------------------------------------------------------------|----------|------------------------|--------------------------------|-------------|--------------|------------------|
| <b>L<sub>18</sub>-Bz<sub>150</sub></b><br>$f_{\text{CKA},0} = 0$      | 5        | 61                     | 16 200                         | 1.13        | 232          | 0.23             |
|                                                                       | 6        | 66                     | 17 700                         | 1.13        | 203          | 0.13             |
|                                                                       | 8        | 70                     | 18 000                         | 1.14        | 191          | 0.11             |
|                                                                       | 20       | 71                     | 18 400                         | 1.12        | 179          | 0.11             |
| <b>L<sub>18</sub>-Bz<sub>150</sub>MP</b><br>$f_{\text{MPDL},0} = 0.2$ | 5        | 39                     | 15 800                         | 1.34        | 36           | 0.004            |
|                                                                       | 6        | 46                     | 17 000                         | 1.35        | 38           | 0.04             |
|                                                                       | 8        | 53                     | 17 200                         | 1.38        | 41           | 0.01             |
|                                                                       | 20       | 76                     | 34 200                         | 1.23        | 52           | 0.02             |
| <b>L<sub>18</sub>-Bz<sub>150</sub>M</b><br>$f_{\text{MDO},0} = 0.2$   | 5        | 12                     | 7 000                          | 1.40        | 43           | 0.04             |
|                                                                       | 6        | 14                     | 7 200                          | 1.41        | 47           | 0.04             |
|                                                                       | 8        | 16                     | 7 200                          | 1.43        | 49           | 0.07             |
|                                                                       | 20       | 23                     | 7 500                          | 1.69        | 149          | 0.18             |

<sup>a</sup> BzMA conversion determined by <sup>1</sup>H NMR. <sup>b</sup> Determined by SEC. <sup>c</sup> Determined by DLS.

**Table S4.** Macromolecular Characteristics of P(LMA-*co*-CKA) Macro-CTAs Synthesized by RAFT Polymerization in Anhydrous Toluene at 70 °C for 4 h.

| Copolymer <sup>a</sup>                                  | $f_{\text{CKA},0}$ | $F_{\text{CKA}}^b$ | Opened<br>CKA <sup>c</sup><br>(%) | Conv. <sup>d</sup><br>(%) / Time<br>(h) | $M_{n,\text{NMR}}^e$<br>(g.mol <sup>-1</sup> ) | $M_{n,\text{SEC}}^f$<br>(g.mol <sup>-1</sup> ) | $\bar{D}^f$ |
|---------------------------------------------------------|--------------------|--------------------|-----------------------------------|-----------------------------------------|------------------------------------------------|------------------------------------------------|-------------|
| P(LMA <sub>13</sub> - <i>co</i> -BMDO <sub>0.7</sub> )  | 0.4                | 0.05               | 66                                | 39/4                                    | 3600                                           | 3 600                                          | 1.23        |
| P(LMA <sub>17</sub> - <i>co</i> -MPDL <sub>0.53</sub> ) | 0.4                | 0.03               | n.d.                              | 43/4                                    | 5700                                           | 4 700                                          | 1.22        |

<sup>a</sup> Determined from  $M_{n,\text{SEC}}$  and  $F_{\text{MPDL}}$  or  $F_{\text{BMDO}}$ . <sup>b</sup> Determined by <sup>1</sup>H NMR after precipitation. <sup>c</sup> Determined by integrating the 2H of opened BMDO (5.0–5.2 ppm) and the 4H of closed BMDO (4.6–4.8 ppm). <sup>d</sup> LMA conversion determined by <sup>1</sup>H NMR. <sup>e</sup> Calculated by <sup>1</sup>H NMR by integrating the 2H of the RAFT agent (7.9–8.0 ppm), the 2H of BMDO (2.2–2.4 ppm) or the 2H of MPDL (2.3–2.7 ppm) and the 2H of LMA (3.8–4.0 ppm). <sup>f</sup> Determined by SEC after precipitation.

**Table S5.** Macromolecular and Colloidal Properties of P(LMA<sub>17</sub>-*co*-MPDL<sub>0.53</sub>)-*b*-PBzMA<sub>150</sub> (L<sub>17</sub>MP<sub>0.53</sub>-Bz<sub>150</sub>) Diblock Copolymer Nanoparticles.

| Targeted<br>copolymer                                 | Conv. <sup>a</sup> (%) /<br>Time (h) | $M_{n,\text{NMR}}^b$<br>(g.mol <sup>-1</sup> ) | $M_{n,\text{SEC}}^c$<br>(g.mol <sup>-1</sup> ) | $\bar{D}^c$ | $D_z^d$<br>(nm) | PSD <sup>d</sup> |
|-------------------------------------------------------|--------------------------------------|------------------------------------------------|------------------------------------------------|-------------|-----------------|------------------|
| L <sub>17</sub> MP <sub>0.53</sub> -Bz <sub>150</sub> | 73/20                                | 98 600                                         | 61 700                                         | 1.27        | 126             | 0.29             |

<sup>a</sup> BzMA conversion determined by <sup>1</sup>H NMR. <sup>b</sup> Determined by <sup>1</sup>H NMR by integrating the 2H of BzMA (4.9–5.1 ppm). <sup>c</sup> Determined by SEC after precipitation. <sup>d</sup> Determined by DLS.

**Table S6.** Degradation Under Accelerated Conditions of P(LMA-*co*-BMDO) Macro-CTAs <sup>a</sup>

| $F_{\text{BMDO}}^b$ | Average consecutive<br>LMA units <sup>c</sup> | Exp. $M_n$ after<br>degradation ( $M_{n,\text{exp}}^d$ )<br>(g.mol <sup>-1</sup> ) | Theo. $M_n$ after<br>degradation ( $M_{n,\text{th}}^e$ )<br>(g.mol <sup>-1</sup> ) | $M_n$<br>decrease <sup>f</sup><br>(%) |
|---------------------|-----------------------------------------------|------------------------------------------------------------------------------------|------------------------------------------------------------------------------------|---------------------------------------|
| 0.05                | 19.0                                          | 4 350                                                                              | 5 000                                                                              | -0                                    |
| 0.08                | 11.5                                          | 5 700                                                                              | 3 100                                                                              | -0                                    |
| 0.09                | 10.1                                          | 2 800                                                                              | 2 700                                                                              | -26                                   |
| 0.10                | 9.0                                           | 2 200                                                                              | 2 500                                                                              | -48                                   |
| 0.14                | 6.1                                           | 1 200                                                                              | 1 700                                                                              | -71                                   |
| 0.24                | 3.2                                           | 600                                                                                | 1 000                                                                              | -83                                   |

<sup>a</sup> Degradation was performed for 1 h at room temperature in THF with 5% KOH in methanol. <sup>b</sup> Determined by <sup>1</sup>H NMR after precipitation. <sup>c</sup> Calculated according to:  $1/F_{\text{BMDO}} - 1$ . <sup>d</sup> Determined by SEC (CHCl<sub>3</sub> with 0.1% v/v TFA). <sup>e</sup> Calculated according to:  $\text{MW}_{\text{LMA}} \times (1 / F_{\text{BMDO}} - 1) + \text{MW}_{\text{BMDO}}$ . <sup>f</sup>  $M_n$  decrease after hydrolytic degradation of the purified copolymers calculated according to:  $(\text{exp. } M_{n,\text{SEC}} - \text{initial } M_{n,\text{SEC}}) / \text{initial } M_{n,\text{SEC}}$ .

**Table S7.** Macromolecular Characteristics of P(LMA-co-CKA) Macro-CTA Synthesized by RAFT Polymerization in Anhydrous Toluene at 90 °C for 4 h

| Macro-CTA <sup>a</sup>                            | $f_{\text{CKA},0}$ | $F_{\text{CKA}}^b$ | Opened<br>CKA <sup>c</sup><br>(%) | Conv. <sup>d</sup> (%) /<br>Time (h) | $M_{n,\text{NMR}}^e$<br>(g.mol <sup>-1</sup> ) | $M_{n,\text{SEC}}^f$<br>(g.mol <sup>-1</sup> ) | $\bar{D}^g$ | $M_n$<br>decrease <sup>g</sup><br>(%) |
|---------------------------------------------------|--------------------|--------------------|-----------------------------------|--------------------------------------|------------------------------------------------|------------------------------------------------|-------------|---------------------------------------|
| P(LMA <sub>28-co</sub> -<br>MPDL <sub>2,1</sub> ) | 0.20               | 0.07               | n.d.                              | 78/4                                 | 8500                                           | 7 600                                          | 1.24        | -38                                   |
| P(LMA <sub>20-co</sub> -<br>BMDO <sub>2,2</sub> ) | 0.40               | 0.10               | 87                                | 64/4                                 | 7800                                           | 5 700                                          | 1.38        | -40                                   |

<sup>a</sup> Determined from  $M_{n,\text{SEC}}$  and  $F_{\text{MPDL}}$  or  $F_{\text{BMDO}}$ . <sup>b</sup> Determined by <sup>1</sup>H NMR after precipitation. <sup>c</sup> Determined by integrating the 2H of opened BMDO (5.0–5.2 ppm) and the 4H of closed BMDO (4.6–4.8 ppm). <sup>d</sup> LMA conversion determined by <sup>1</sup>H NMR. <sup>e</sup> Calculated by <sup>1</sup>H NMR by integrating the 2H of the RAFT agent (7.9–8.0 ppm), the 2H of BMDO (2.2–2.4 ppm) or the 2H of MPDL (2.3–2.7 ppm) and the 2H of LMA (3.8–4.0 ppm). <sup>f</sup> Determined by SEC after precipitation. <sup>g</sup> Determined according to: (exp.  $M_{n,\text{SEC}}$  – initial  $M_{n,\text{SEC}}$ ) / initial  $M_{n,\text{SEC}}$ .

**Table S8.** Macromolecular and Colloidal Properties of P(LMA-*co*-CKA)-*b*-P(BzMA-*co*-CKA) Diblock Copolymer Nanoparticles.

| Macro-CTA                                     | Core CKA | $f_{\text{CKA},0}$ | $F_{\text{CKA}}^a$ | Conv. <sup>b</sup> (%)<br>/ Time (h) | $M_{n,\text{NMR}}^c$<br>(g.mol <sup>-1</sup> ) | $M_{n,\text{SEC}}^d$<br>(g.mol <sup>-1</sup> ) | $\bar{D}^d$ | $D_z^e$<br>(nm) | PSD <sup>e</sup> |
|-----------------------------------------------|----------|--------------------|--------------------|--------------------------------------|------------------------------------------------|------------------------------------------------|-------------|-----------------|------------------|
| P(LMA <sub>20</sub> -co-BMDO <sub>2.2</sub> ) | -        | 0                  | -                  | 79/16                                | 119 300                                        | 76 900                                         | 1.57        | 166             | 0.25             |
| P(LMA <sub>20</sub> -co-BMDO <sub>2.2</sub> ) | BMDO     | 0.40               | 0.12               | 52/16                                | 18 600                                         | 13 200                                         | 1.60        | 61              | 0.01             |
| P(LMA <sub>28</sub> -co-MPDL <sub>2.1</sub> ) | -        | 0                  | -                  | 58/16                                | 87 900                                         | 36 200                                         | 1.13        | 96              | 0.10             |
| P(LMA <sub>28</sub> -co-MPDL <sub>2.1</sub> ) | MPDL     | 0.40               | 0.15               | 50/16                                | 23 900                                         | 18 000                                         | 1.35        | 115             | 0.22             |

<sup>a</sup> Determined by <sup>1</sup>H NMR after precipitation. <sup>b</sup> LMA conversion determined by <sup>1</sup>H NMR. <sup>c</sup> Determined by <sup>1</sup>H NMR by integrating the 2H of BMDO (2.2–2.4 ppm) or 2H of MPDL (2.3–2.7 ppm) and the 2H of BzMA (4.9–5.1 ppm). <sup>d</sup> Determined by SEC after precipitation. <sup>e</sup> Determined by DLS.

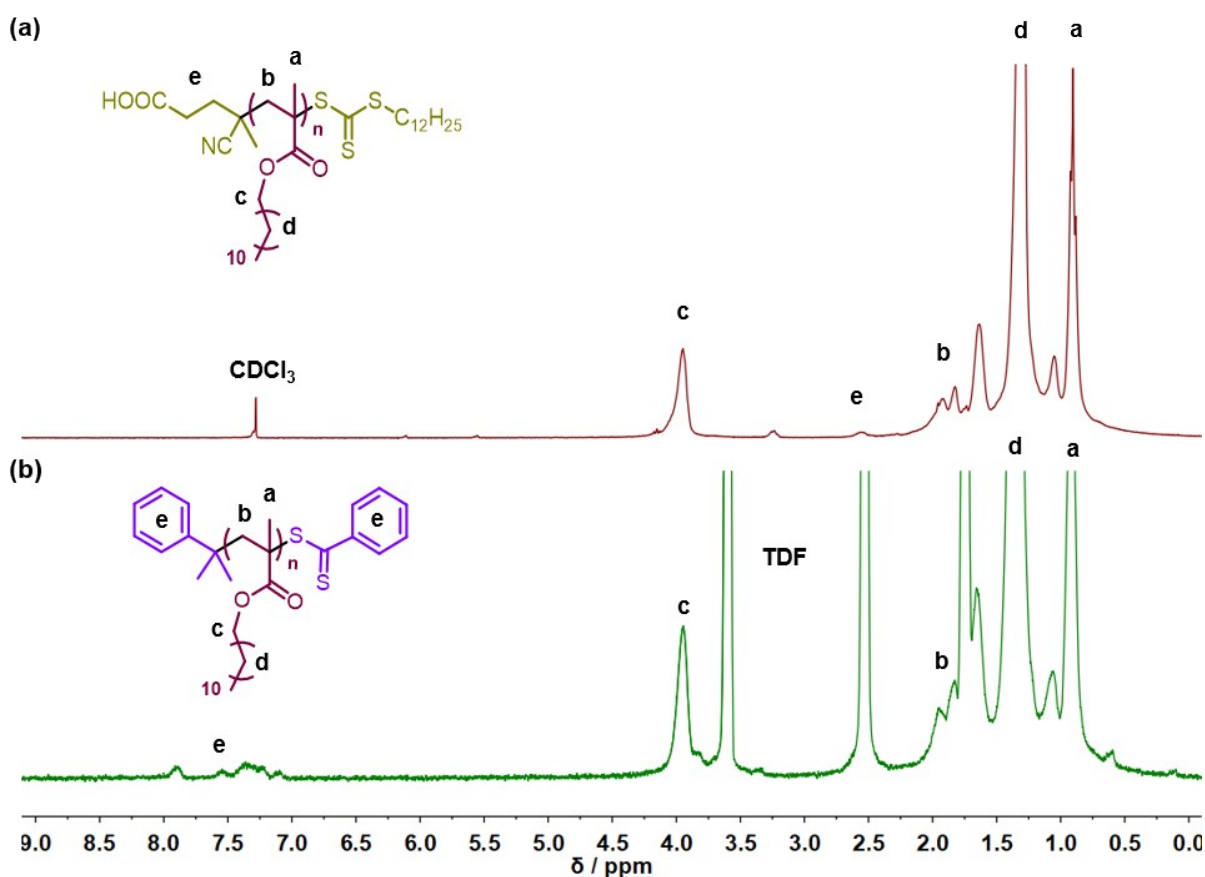

**Figure S1.**  $^1\text{H}$  NMR spectra in the 0–9 ppm region of: (a)  $\text{PLMA}_{18}\text{-CDSPA}$  in  $\text{CDCl}_3$  and (b)  $\text{PLMA}_{18}\text{-CDB}$  in tetrahydrofuran- $d_8$ , TDF.

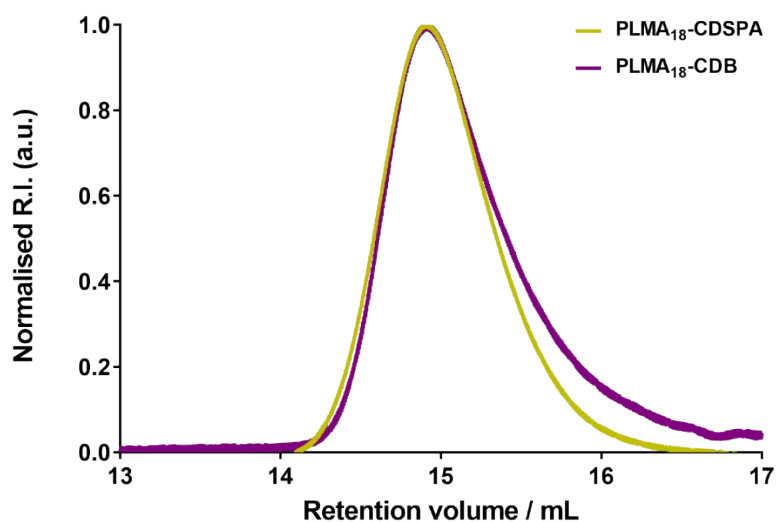

**Figure S2.** SEC chromatograms ( $\text{CHCl}_3$ ) of  $\text{PLMA}_{18}\text{-CDSPA}$  and  $\text{PLMA}_{18}\text{-CDB}$ .

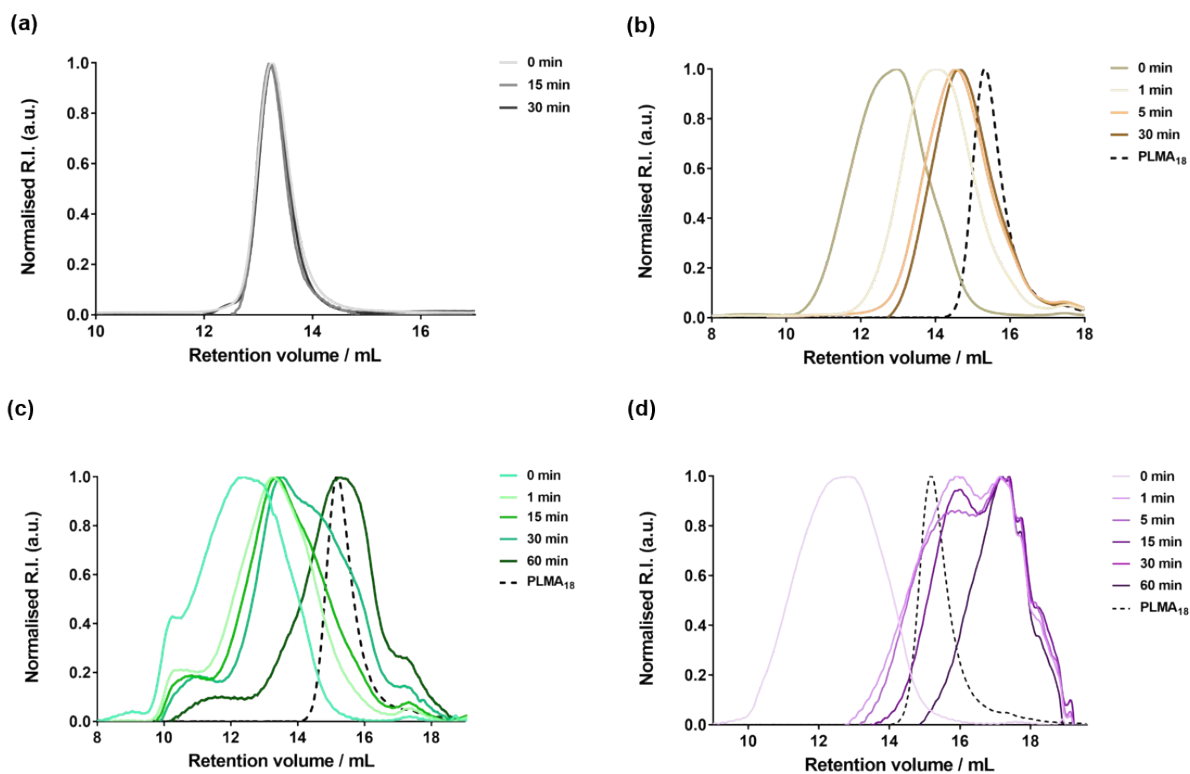

**Figure S3.** Evolution of the SEC chromatograms ( $\text{CHCl}_3$ , 0.1% v/v TFA) with time during the degradation under accelerated conditions (THF/MeOH, KOH 2.5%) of  $\text{L}_{18}\text{Bz}_{150}\text{M}$  copolymers



as function of the MDO content: (a)  $F_{\text{MDO}} = 0$ ; (b)  $F_{\text{MDO}} = 0.04$ ; (c)  $F_{\text{MDO}} = 0.10$  and (d)  $F_{\text{MDO}} = 0.19$ .

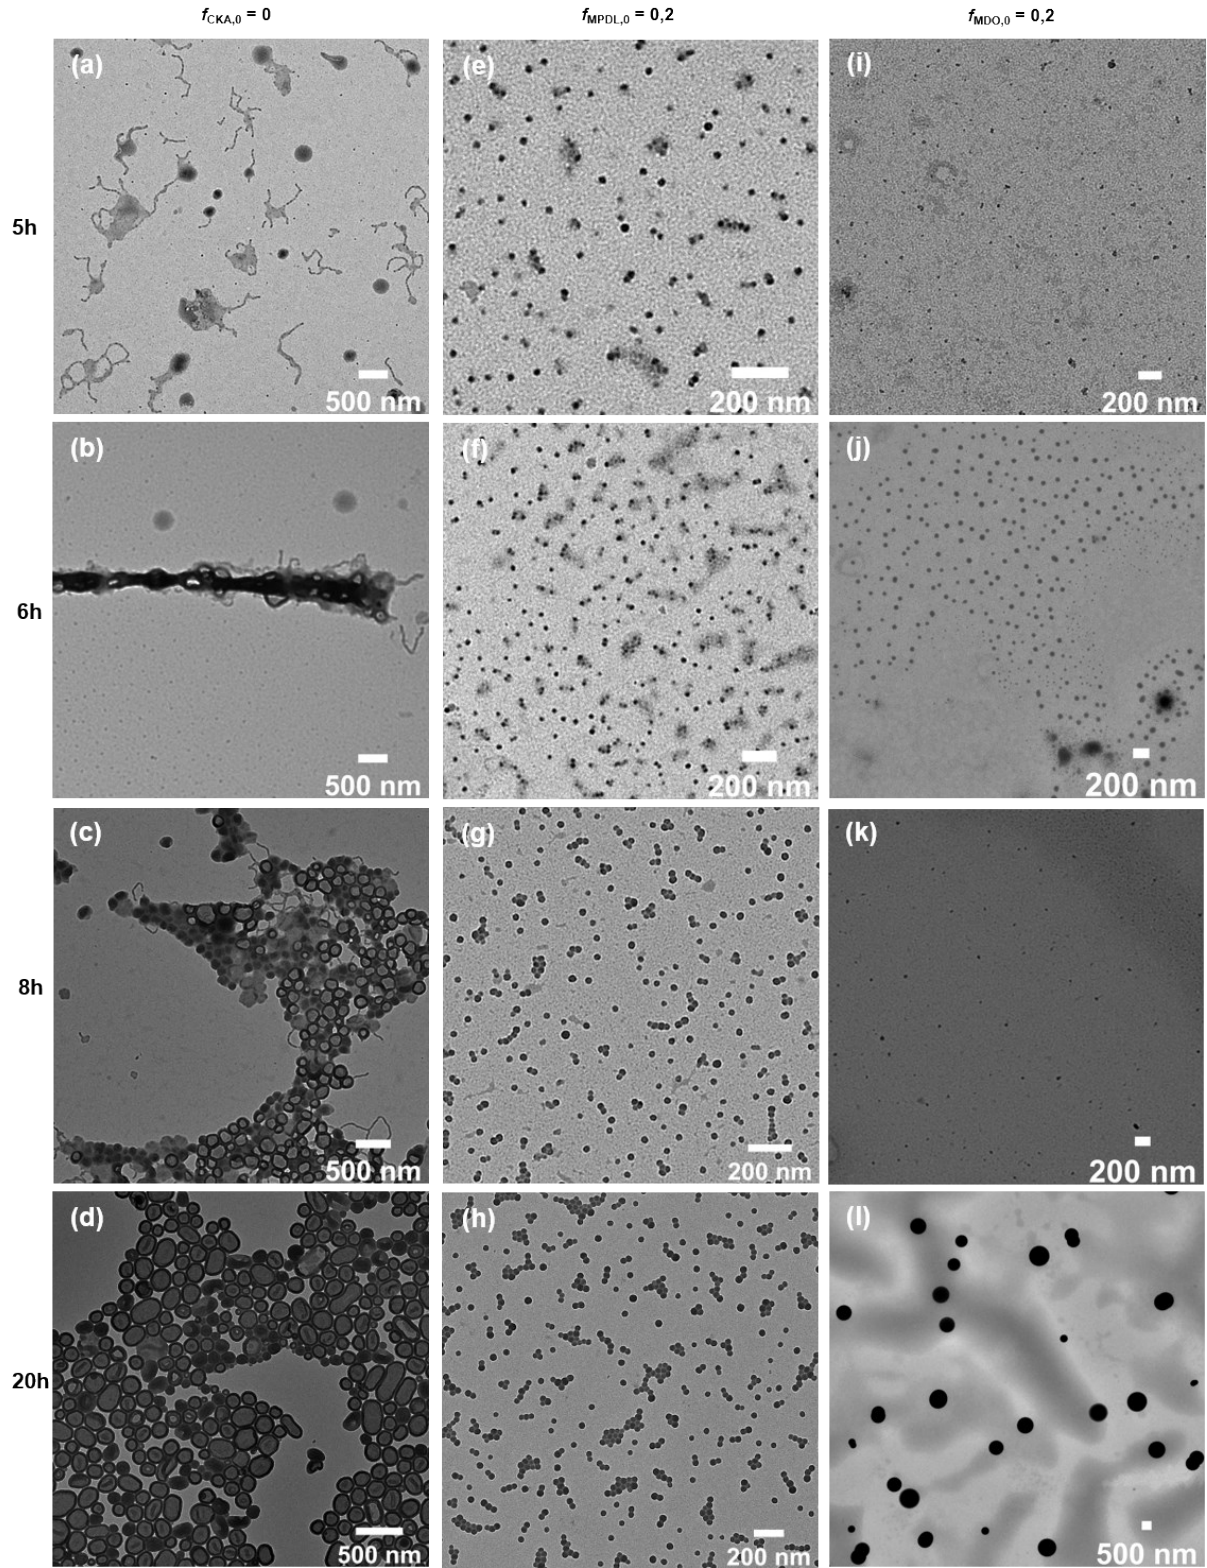

**Figure S4.** Representative TEM images of **L<sub>18</sub>-Bz<sub>150</sub>**, **L<sub>18</sub>-Bz<sub>150</sub>MP** ( $f_{\text{MPDL}} = 0.2$ ) and **L<sub>18</sub>-Bz<sub>150</sub>M** ( $f_{\text{MDO}} = 0.2$ ) nanoparticles with the reaction time.

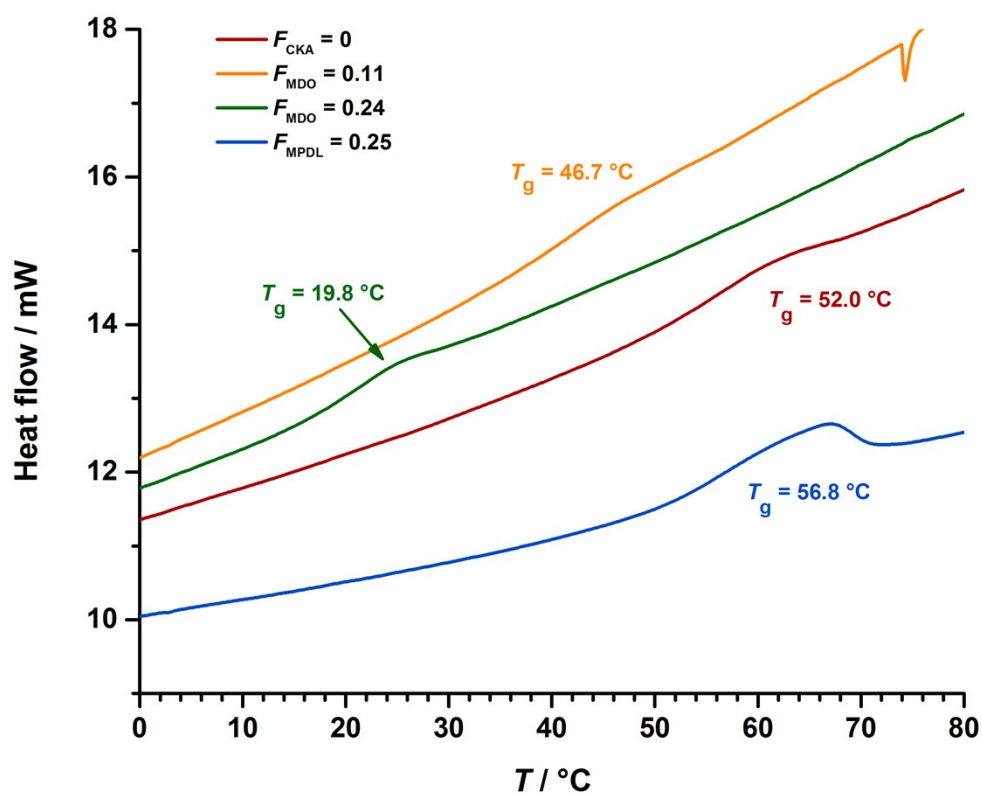

**Figure S5.** DSC measurements performed on **L<sub>18</sub>-Bz<sub>150</sub>** ( $F_{\text{CKA}} = 0$ ), **L<sub>18</sub>-Bz<sub>150</sub>MP** ( $F_{\text{MPDL}} = 0.25$ ), **L<sub>18</sub>-Bz<sub>150</sub>M** ( $F_{\text{MDO}} = 0.19$  and  $F_{\text{MDO}} = 0.10$ ).

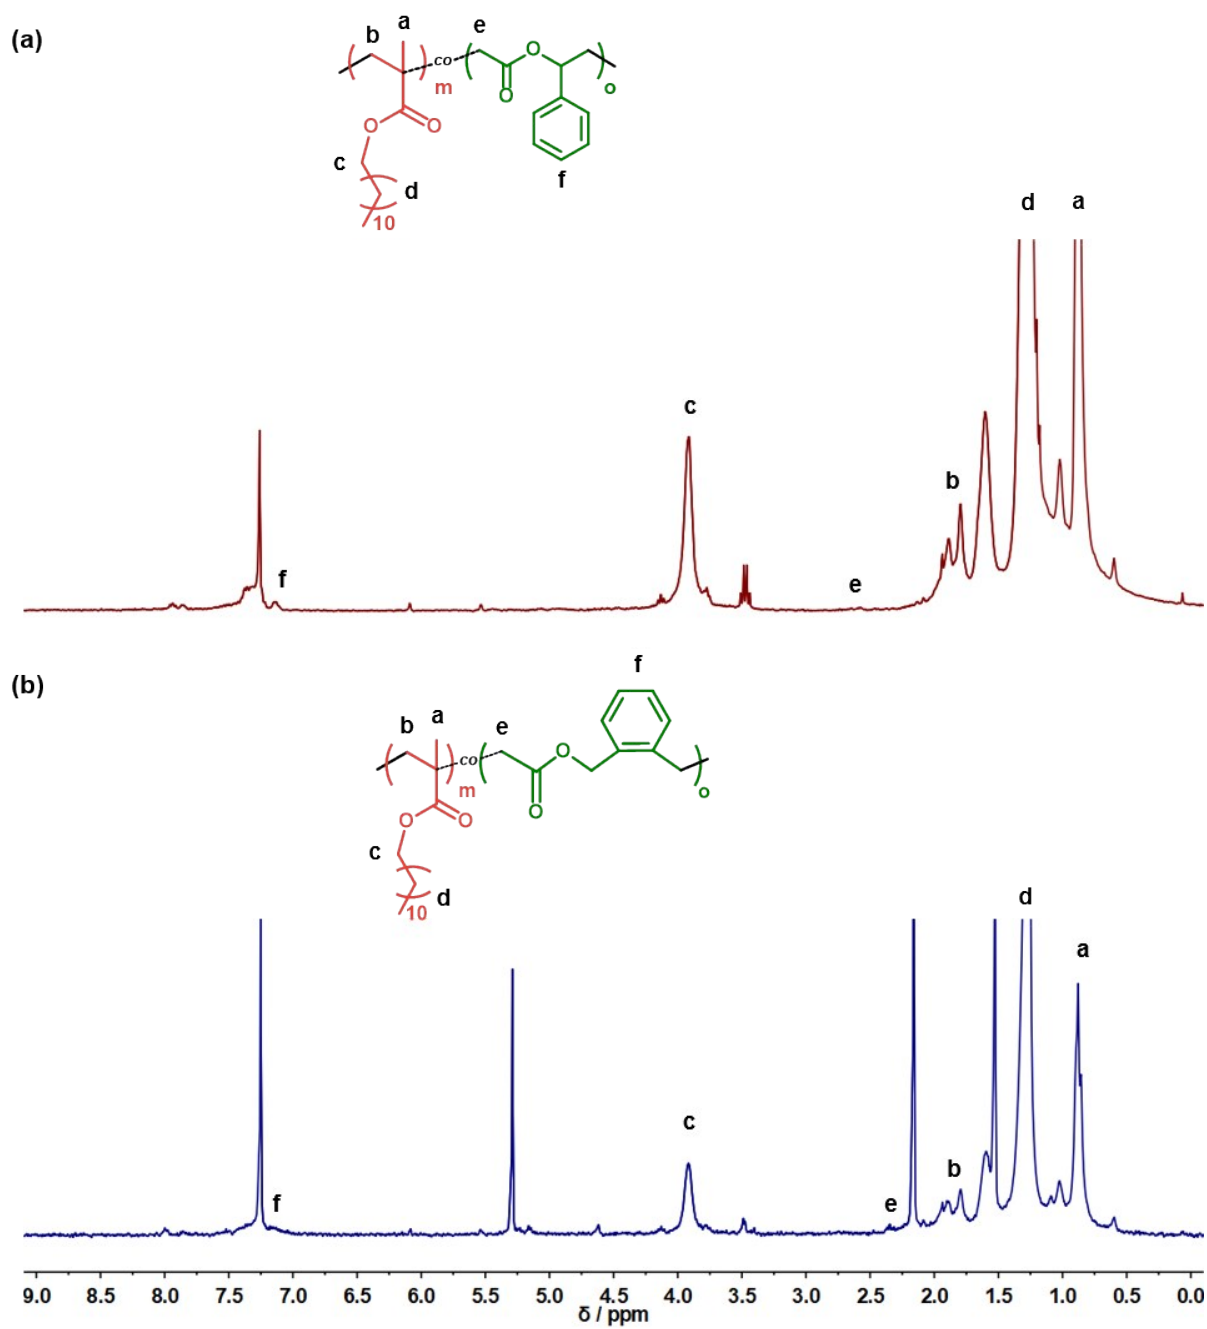

**Figure S6.**  $^1\text{H}$  NMR spectra in  $\text{CDCl}_3$  in the 0–9.0 ppm region of: (a)  $\text{P}(\text{LMA}_{17}\text{-co-MPDL}_{0.53})$  and (b)  $\text{P}(\text{LMA}_{13}\text{-co-BMDO}_{0.7})$  macro-CTAs.

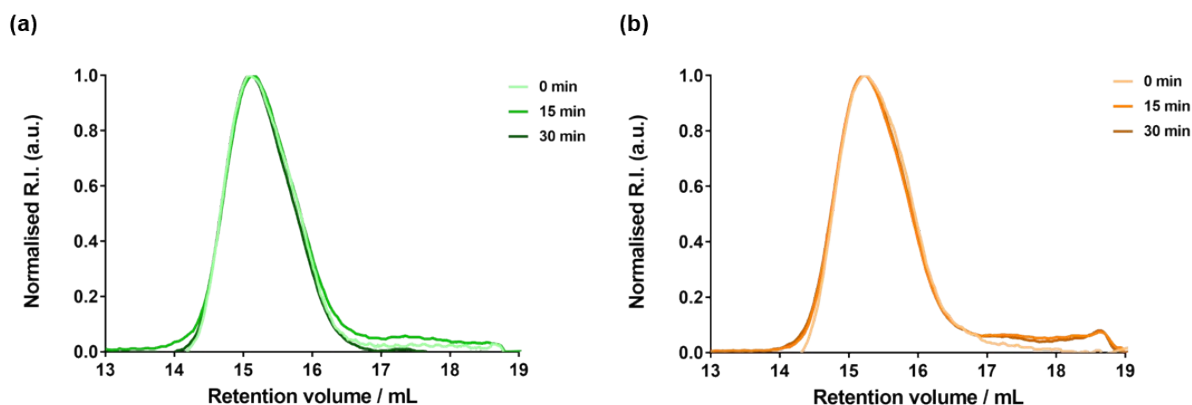

**Figure S7.** Evolution of the SEC chromatograms ( $\text{CHCl}_3$ ) at different time during the degradation under accelerated conditions (THF/MeOH, KOH 2.5%) of: (a)  $\text{P(LMA}_{17}\text{-co-MPDL}_{0.53})$  and (b)  $\text{P(LMA}_{13}\text{-co-BMDO}_{0.7})$ .

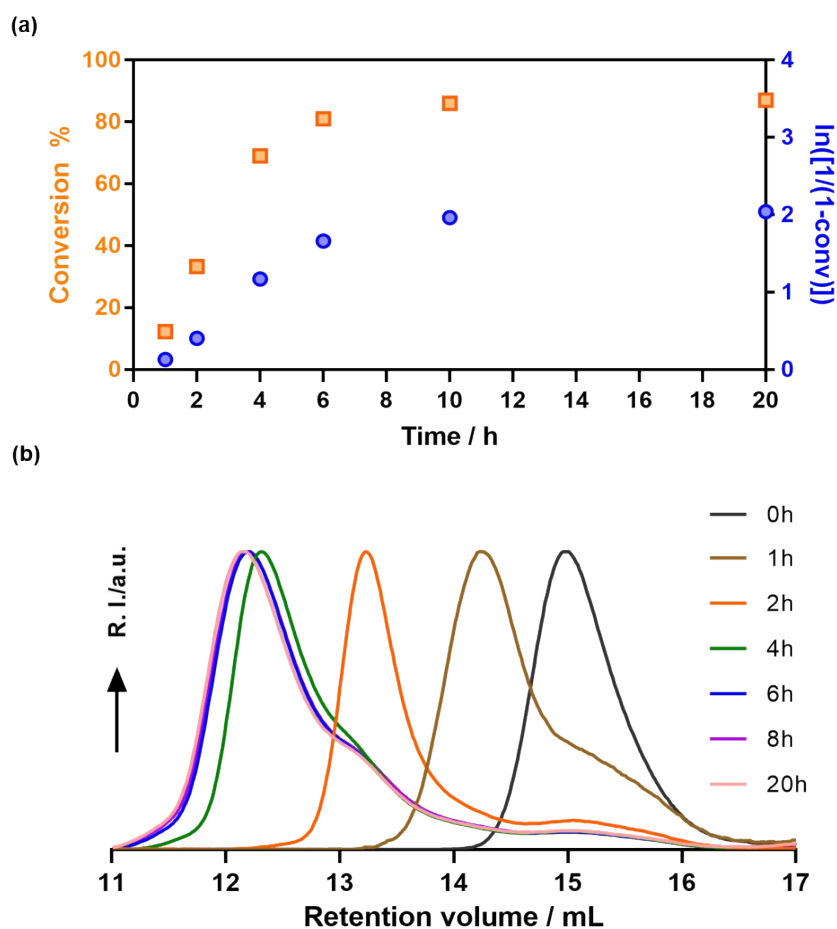

**Figure S8.** Synthesis of  $\text{L}_{17}\text{MP}_{0.53}\text{-Bz}_{150}$  diblock copolymers by rROPISA in heptane at  $90^\circ\text{C}$ : (a) Evolution of BzMA conversion and logarithmic conversion vs. time plots and (b) evolution of the SEC chromatograms ( $\text{CHCl}_3$ ) with time using normalised RI values.

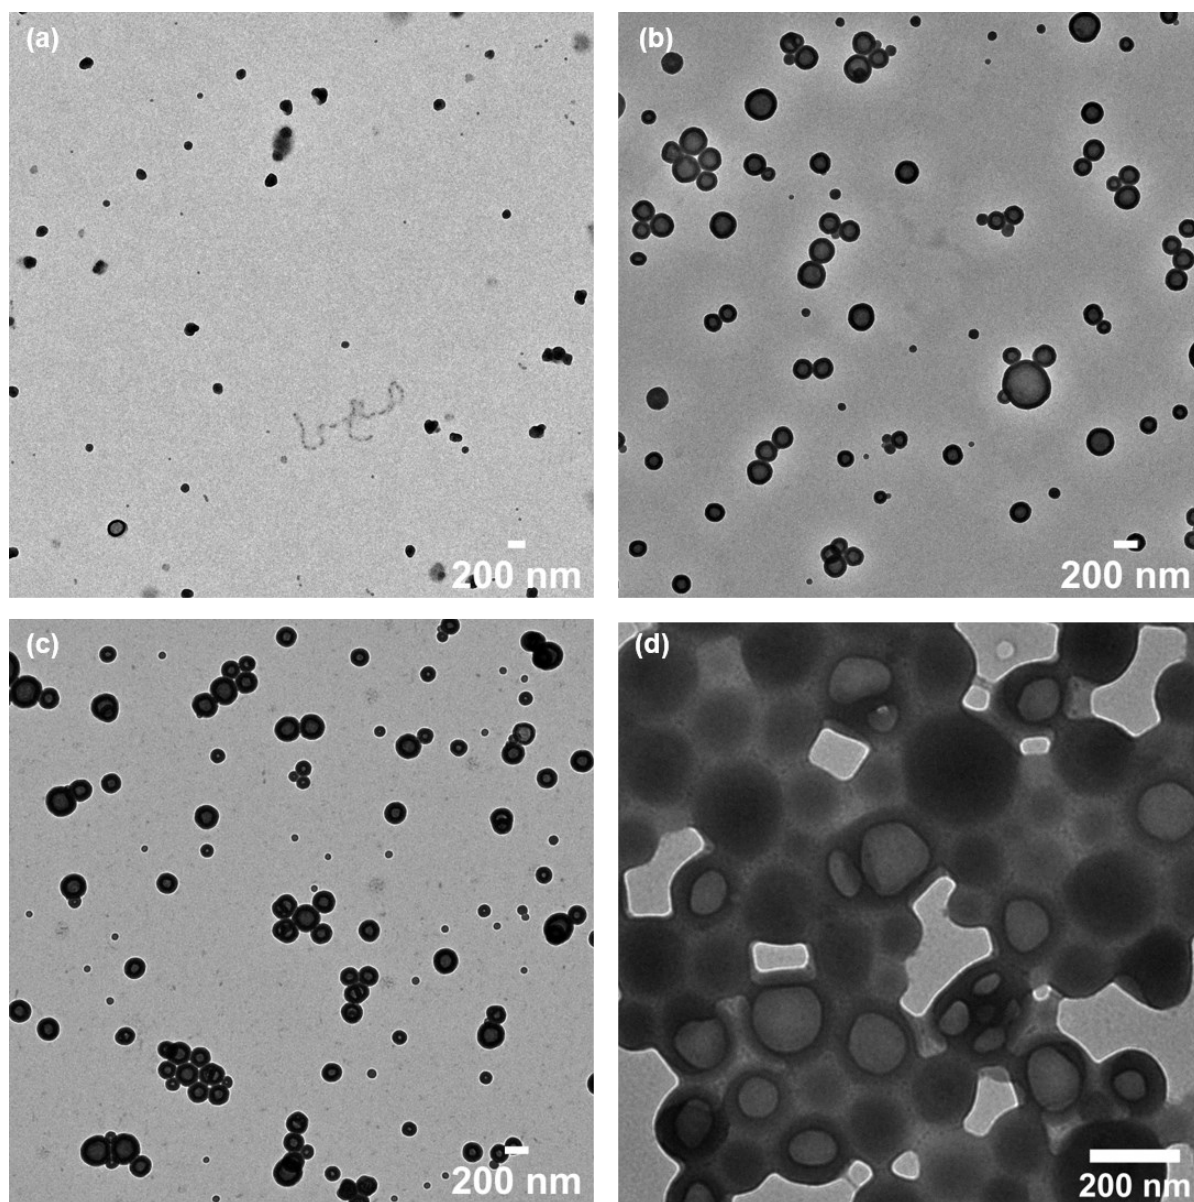

**Figure S9.** Representative TEM images of  $L_{17}MP_{0.53}-Bz_{150}$  nanoparticles at different time points: (a) 2h; (b) 4h; (c) 8h and (d) 20h.

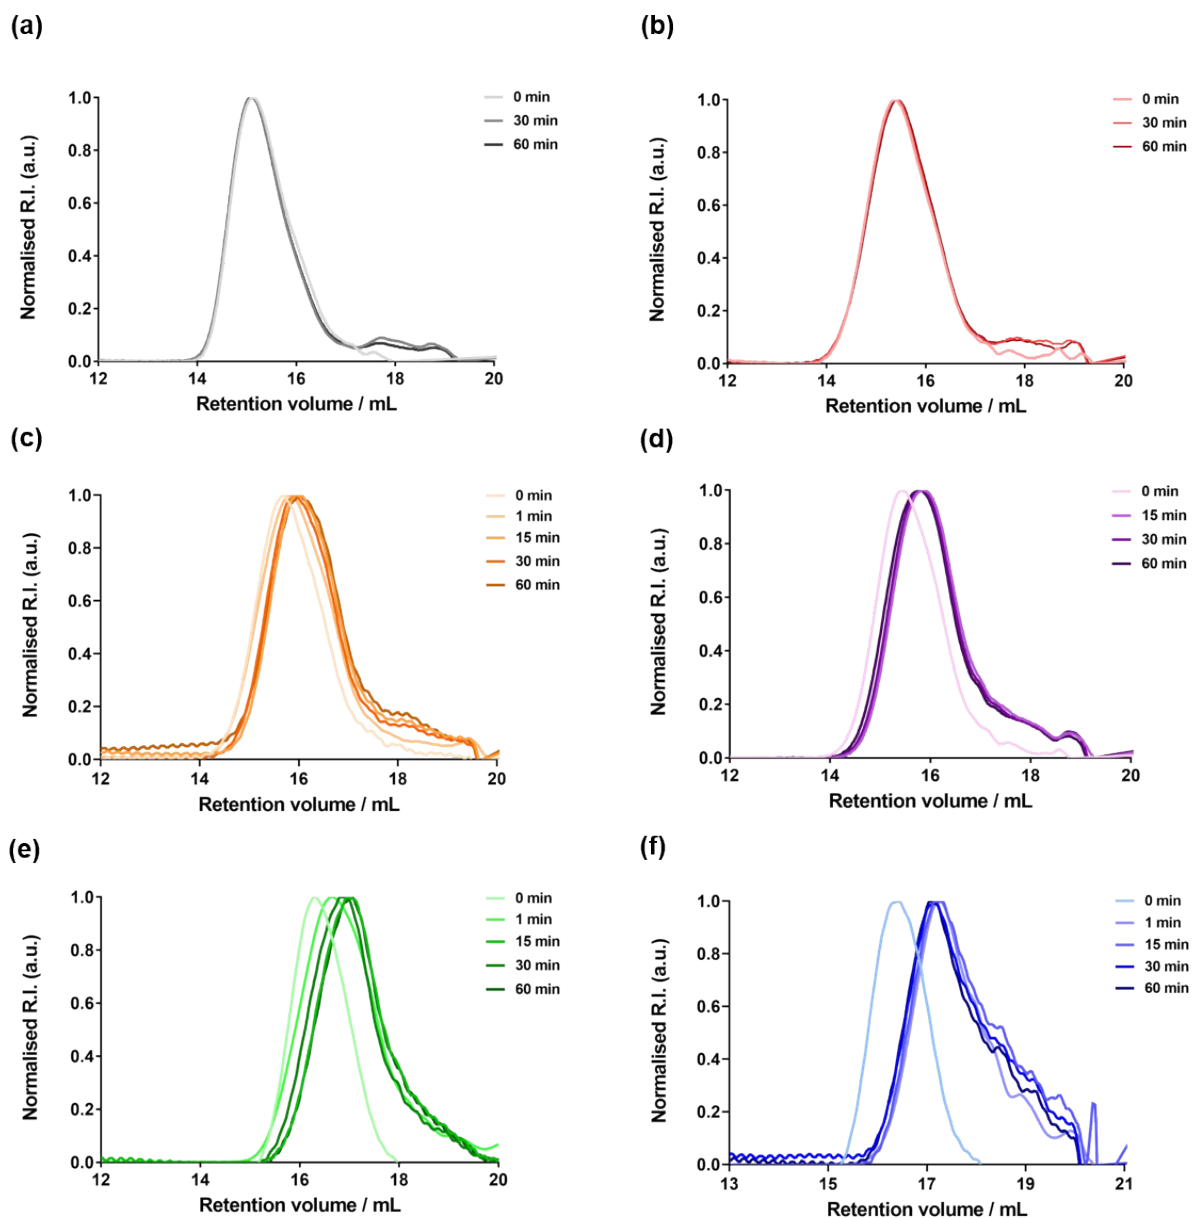

**Figure S10.** Evolution of the SEC chromatograms ( $\text{CHCl}_3$  with 0.1% v/v TFA) at different time during the degradation under accelerated conditions (THF/MeOH, KOH 2.5%) of P(LMA-co-BMDO) macro-initiator (a)  $F_{BMDO} = 0.05$ , (b)  $F_{BMDO} = 0.08$ , (c)  $F_{BMDO} = 0.09$ , (d)  $F_{BMDO} = 0.10$ , (e)  $F_{BMDO} = 0.14$ , (f)  $F_{BMDO} = 0.24$ .

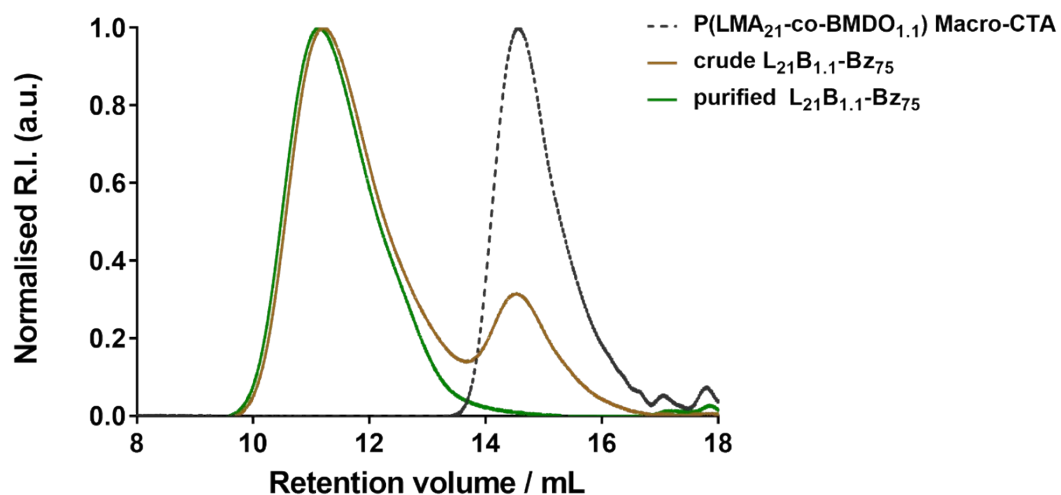

**Figure S11.** SEC chromatograms (CHCl<sub>3</sub>) of P(LMA<sub>21</sub>-co-BMDO<sub>1.1</sub>) macro-CTA and of L<sub>21</sub>B<sub>1.1</sub>-Bz<sub>75</sub> copolymers before and after purification.

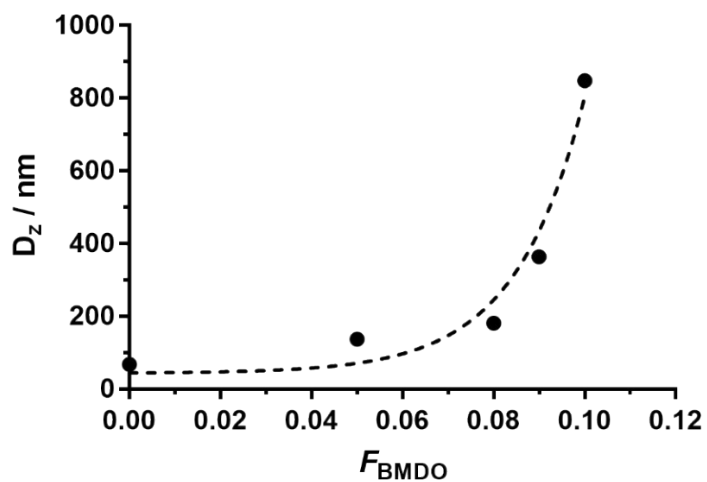

**Figure S12.** Evolution of the intensity-average diameter ( $D_z$ ) of P(LMA-co-BMDO)-*b*-PBzMA<sub>75</sub> nanoparticles with  $F_{\text{BMDO}}$ .

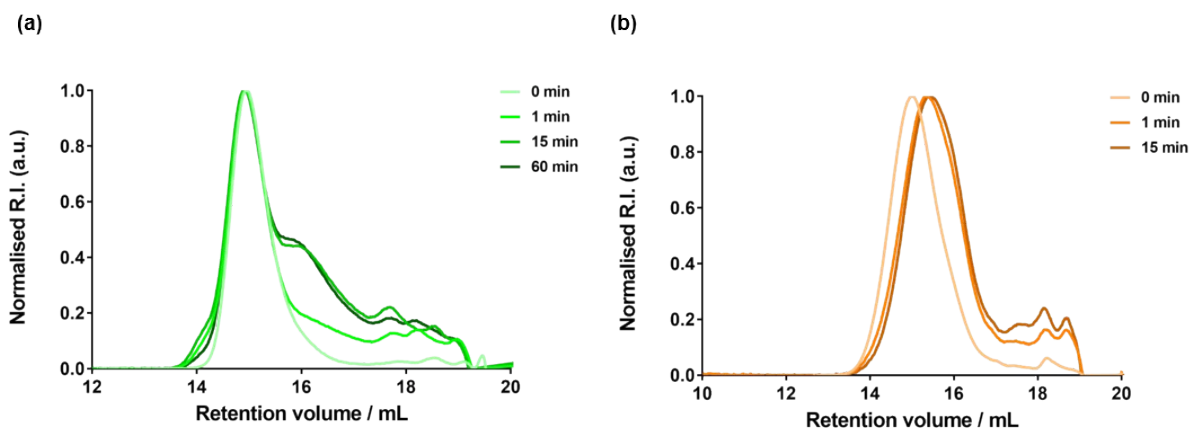

**Figure S13.** Evolution of the SEC chromatograms (CHCl<sub>3</sub>) at different time during the degradation under accelerated conditions (THF/MeOH, KOH 2.5%) of: (a) P(LMA<sub>20</sub>-co-BMDO<sub>2.2</sub>) and (b) P(LMA<sub>28</sub>-co-MPDL<sub>2.1</sub>).

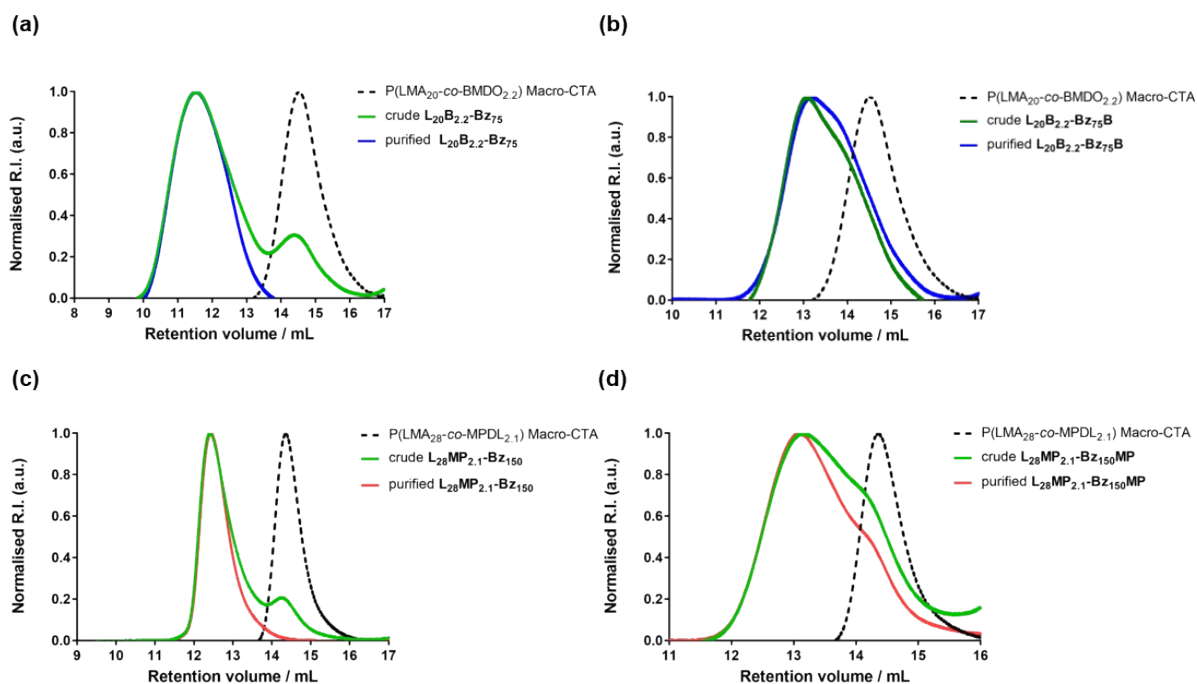

**Figure S14.** Evolution of the SEC chromatograms (CHCl<sub>3</sub>) obtained after chain extension by rROPISA from: (a) P(LMA<sub>20</sub>-co-BMDO<sub>2.2</sub>) with BzMA; (b) P(LMA<sub>20</sub>-co-BMDO<sub>2.2</sub>) with BzMA and BMDO ( $f_{\text{BMDO}} = 0.4$ ); (c) P(LMA<sub>28</sub>-co-MPDL<sub>2.1</sub>) and (d) P(LMA<sub>28</sub>-co-MPDL<sub>2.1</sub>) and MPDL ( $f_{\text{MPDL}} = 0.4$ ).



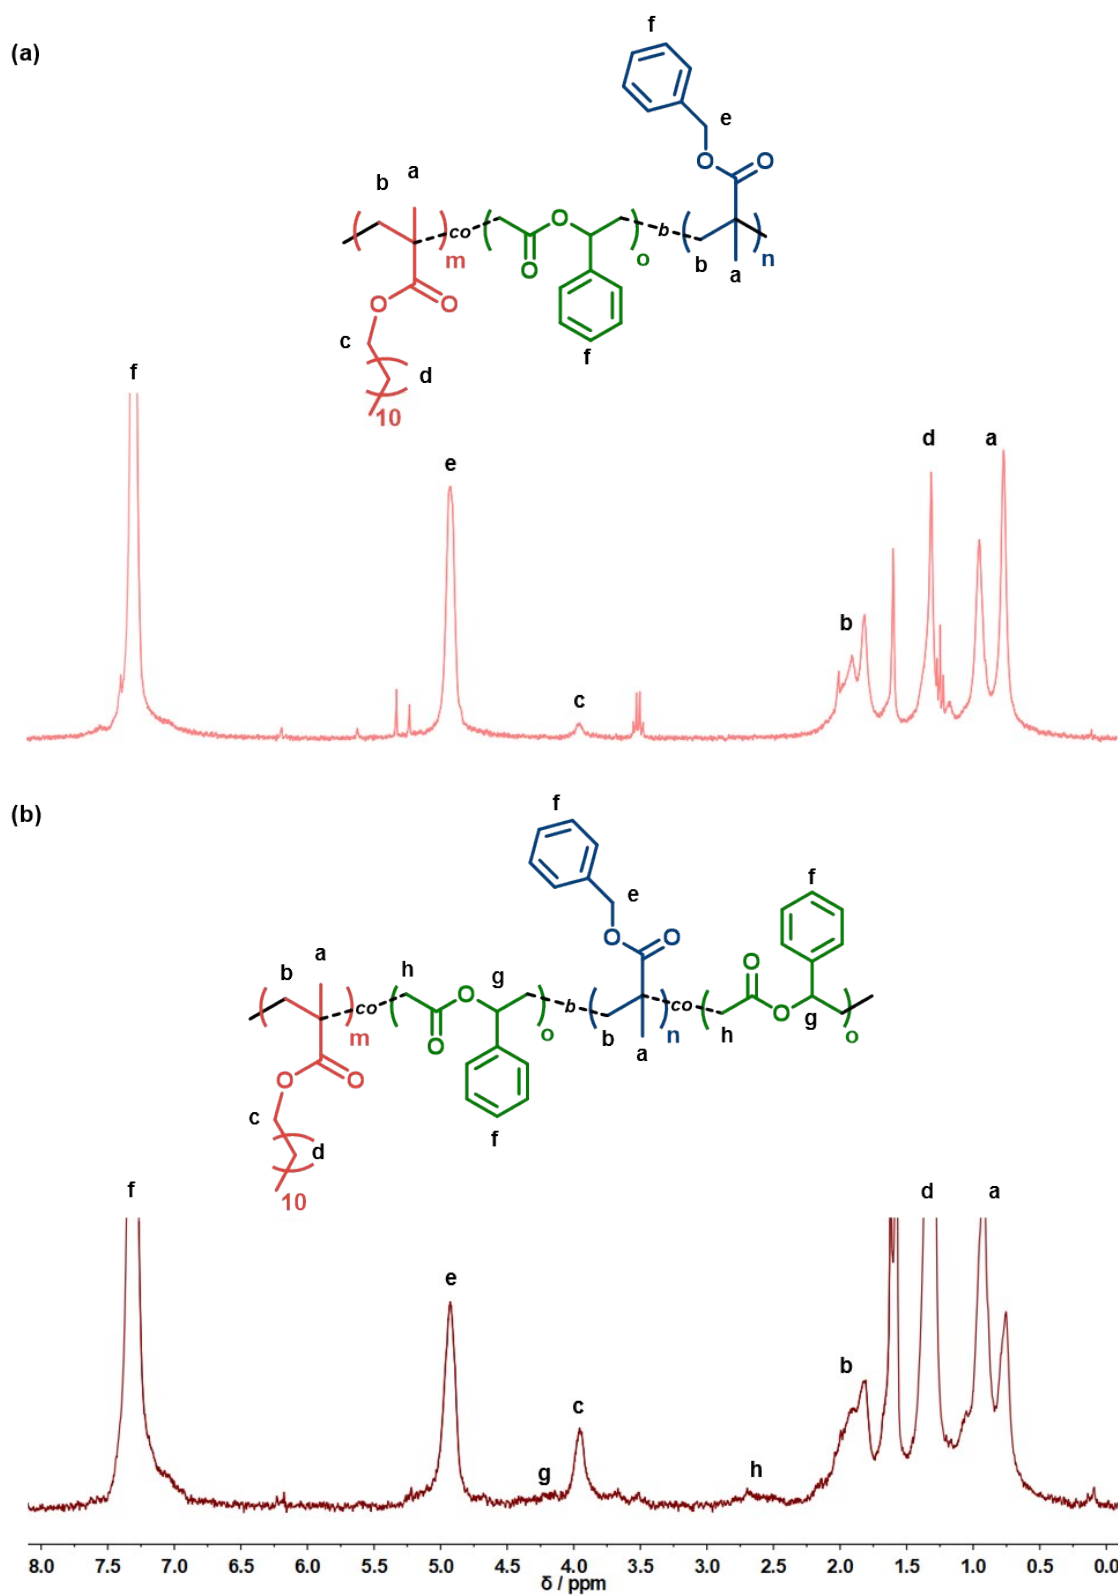

**Figure S15.**  $^1\text{H}$  NMR spectra in  $\text{CDCl}_3$  in the 0–8 ppm region of: (a)  $\text{L}_{28}\text{MP}_{2.1}\text{-Bz}_{150}$  and (b)  $\text{L}_{28}\text{MP}_{2.1}\text{-Bz}_{150}\text{MP}$  copolymers. Note that protons belonging to MPDL are no longer visible for  $\text{L}_{28}\text{MP}_{2.1}\text{-Bz}_{150}$ .

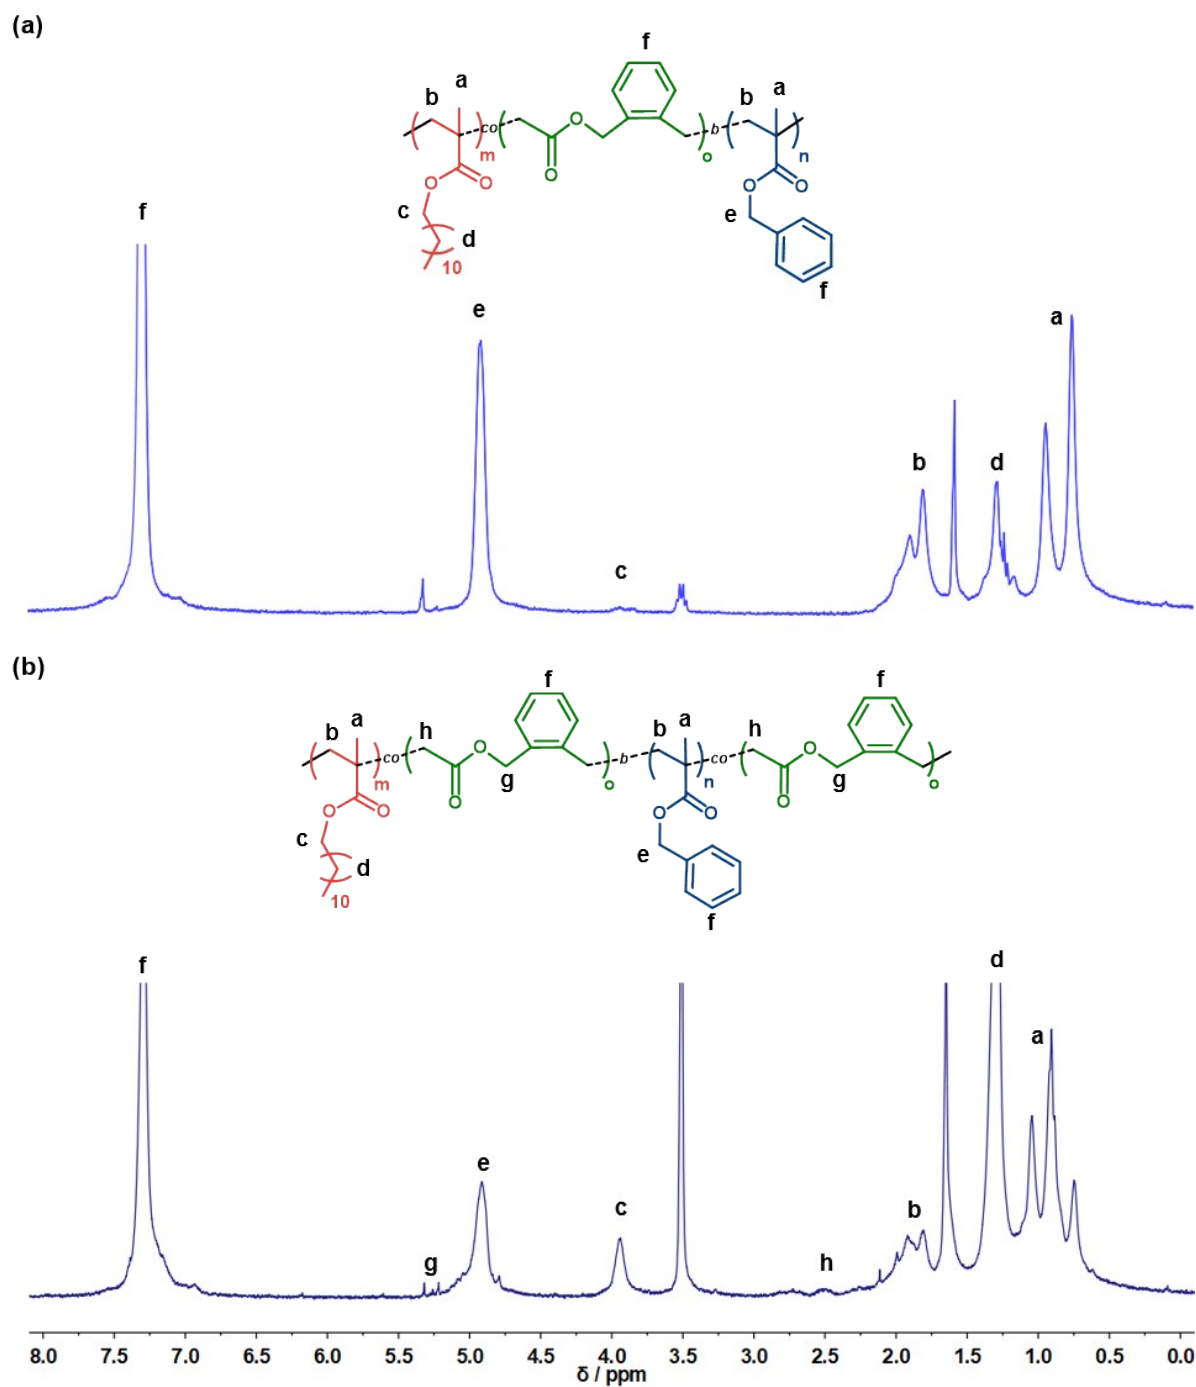

**Figure S16.**  $^1\text{H}$  NMR spectra in  $\text{CDCl}_3$  in the 0–8 ppm region of: (a)  $\text{L}_{20}\text{B}_{2.2}\text{-Bz}_{75}$  and (b)  $\text{L}_{20}\text{B}_{2.2}\text{-Bz}_{75}\text{B}$  copolymers. Note that protons belonging to BMDO are no longer visible for  $\text{L}_{20}\text{B}_{2.2}\text{-Bz}_{75}$ .
